# Supplementary material
Source: PubMed Central journal article supplement (PMC3578135)

# Supplemental Figure 1

A

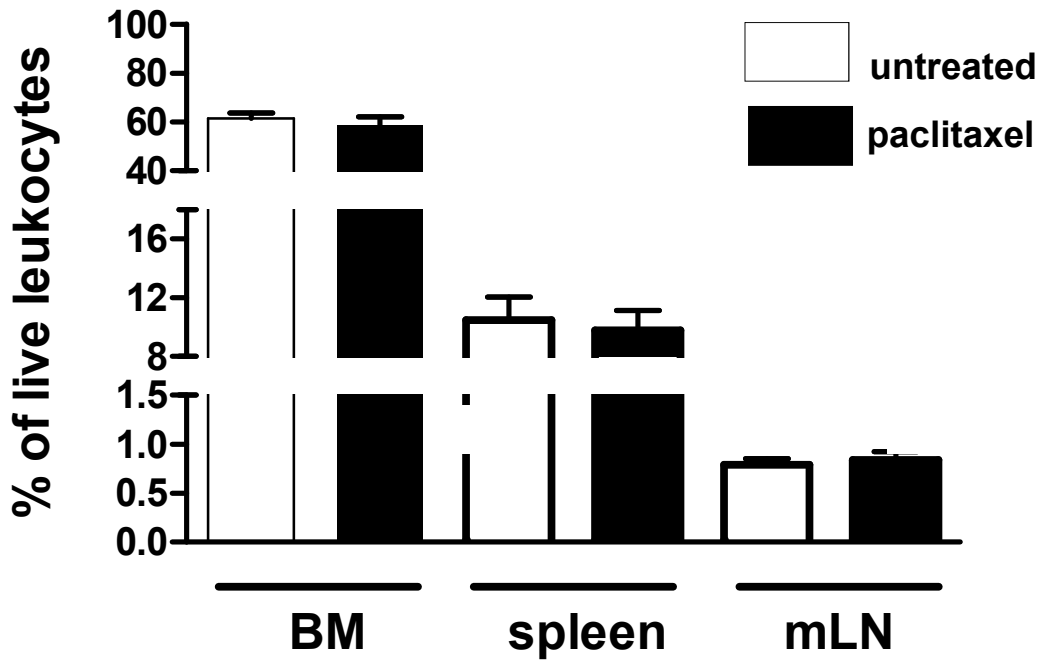

B

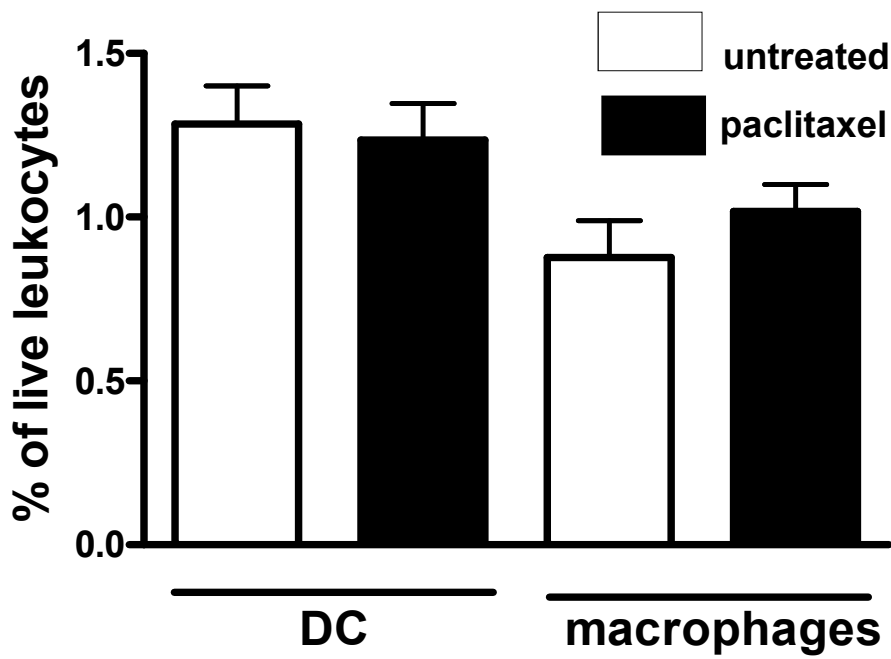

# Supplemental Figure 2

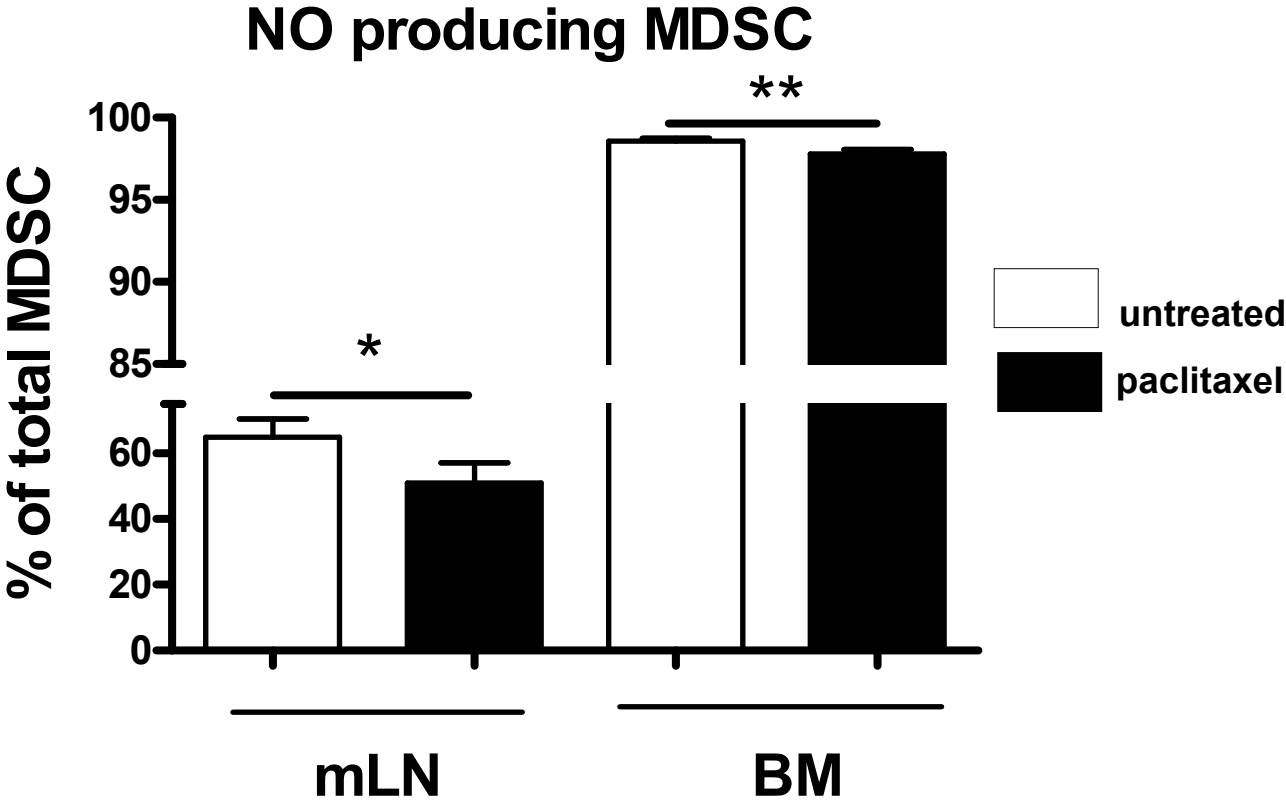

Supplemental Figure 3

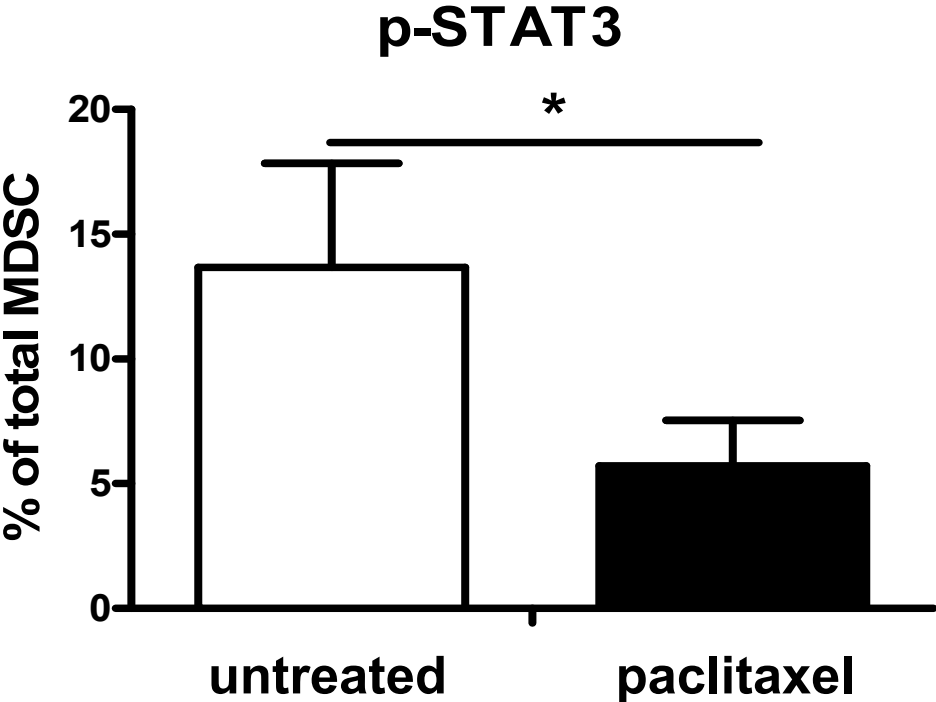

# Supplemental Figure 4

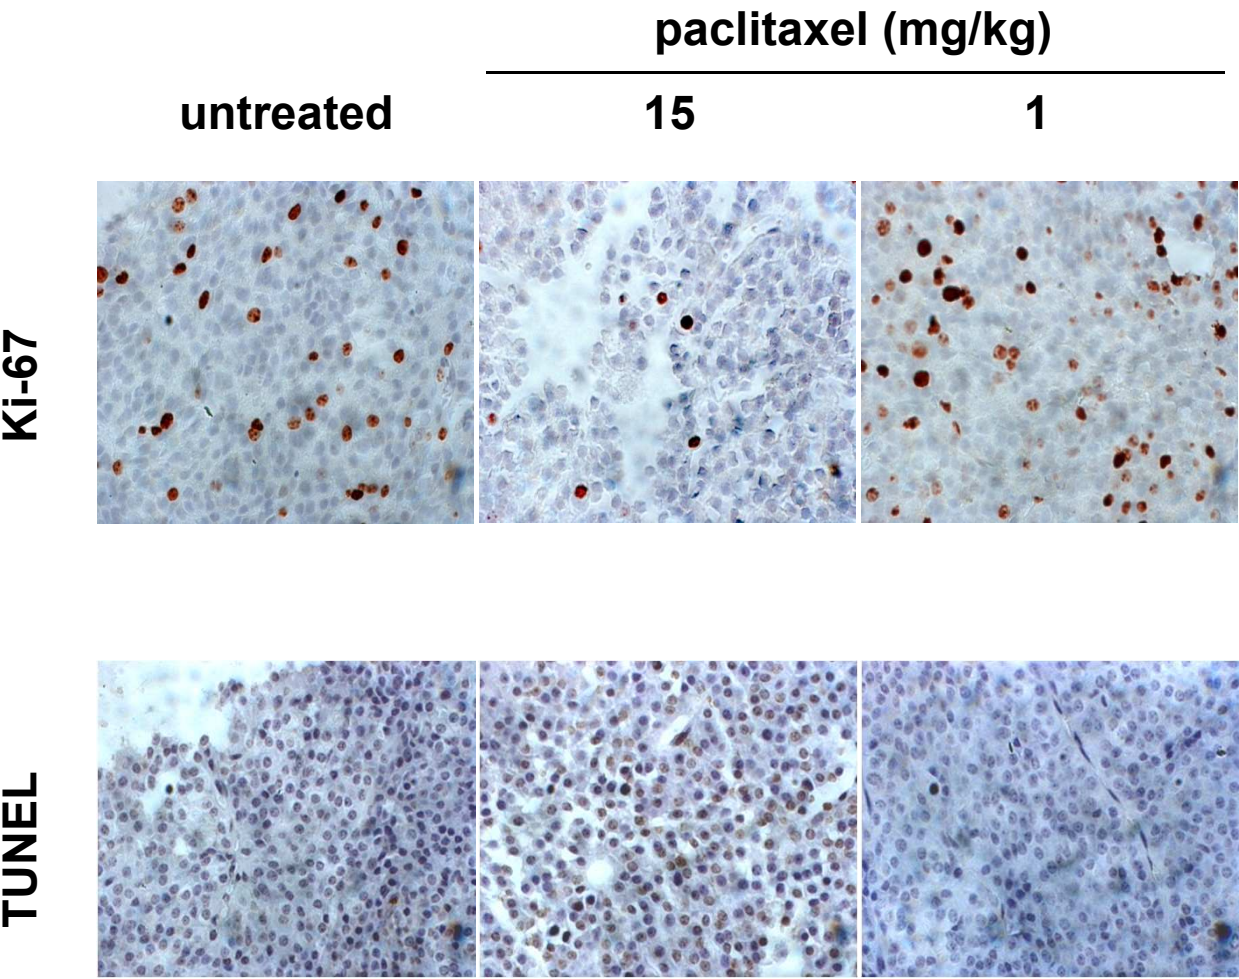

Supplement: NIHMS433478-supplement-2.pdf [file NIHMS433478-supplement-2.pdf]
